1       **Complex patterns of multimorbidity associated with severe COVID-19 and Long COVID**

2

3       Maik Pietzner<sup>1,2,3</sup>, Spiros Denaxas<sup>4,5,6,7</sup>, Summaira Yasmeen<sup>1</sup>, Maria A. Ulmer<sup>8</sup>, Tomoko  
4       Nakanishi<sup>2</sup>, Matthias Arnold<sup>8,9</sup>, Gabi Kastenmüller<sup>8</sup>, Harry Hemingway<sup>4,5,7\*</sup>, Claudia  
5       Langenberg<sup>1,2,3,\*</sup>

6

7       <sup>1</sup>Computational Medicine, Berlin Institute of Health at Charité – Universitätsmedizin Berlin,  
8       Berlin, Germany

9       <sup>2</sup>Precision Healthcare University Research Institute, Queen Mary University of London,  
10       London, UK

11       <sup>3</sup>MRC Epidemiology Unit, University of Cambridge, Cambridge, UK

12       <sup>4</sup>Institute of Health Informatics, University College London, London, UK

13       <sup>5</sup>Health Data Research UK, London, UK

14       <sup>6</sup>British Heart Foundation Data Science Centre, London, UK

15       <sup>7</sup>National Institute of Health Research University College London Hospitals Biomedical  
16       Research Centre

17       <sup>8</sup>Institute of Computational Biology, Helmholtz Zentrum München - German Research Center  
18       for Environmental Health, Neuherberg, Germany

19       <sup>9</sup>Department of Psychiatry and Behavioral Sciences, Duke University, Durham, NC, USA

20

21       \*these authors jointly supervised the work

22

23       **Corresponding authors**

24       Dr Maik Pietzner ([maik.pietzner@bih-charite.de](mailto:maik.pietzner@bih-charite.de))

25       Prof Harry Hemingway ([h.hemingway@ucl.ac.uk](mailto:h.hemingway@ucl.ac.uk))

26       Prof Claudia Langenberg ([claudia.langenberg@qmul.ac.uk](mailto:claudia.langenberg@qmul.ac.uk))

27

28

29

30 **ABSTRACT**

31

32 Early evidence that patients with (multiple) pre-existing diseases are at highest risk for severe  
33 COVID-19 has been instrumental in the pandemic to allocate critical care resources and later  
34 vaccination schemes. However, systematic studies exploring the breadth of medical  
35 diagnoses, including common, but non-fatal diseases are scarce, but may help to understand  
36 severe COVID-19 among patients at supposedly low risk. Here, we systematically harmonized  
37 >12 million primary care and hospitalisation health records from ~500,000 UK Biobank  
38 participants into 1448 collated disease terms to systematically identify diseases predisposing  
39 to severe COVID-19 (requiring hospitalisation or death) and its post-acute sequelae, Long  
40 COVID. We identified a total of 679 diseases associated with an increased risk for severe  
41 COVID-19 (n=672) and/or Long COVID (n=72) that spanned almost all clinical specialties and  
42 were strongly enriched in clusters of cardio-respiratory and endocrine-renal diseases. For 57  
43 diseases, we established consistent evidence to predispose to severe COVID-19 based on  
44 survival and genetic susceptibility analyses. This included a possible role of symptoms of  
45 malaise and fatigue as a so far largely overlooked risk factor for severe COVID-19. We finally  
46 observed partially opposing risk estimates at known risk loci for severe COVID-19 for  
47 etiologically related diseases, such as post-inflammatory pulmonary fibrosis (e.g., *MUC5B*,  
48 *NPNT*, and *PSMD3*) or rheumatoid arthritis (e.g., *TYK2*), possibly indicating a segregation of  
49 disease mechanisms. Our results provide a unique reference that demonstrates how 1)  
50 complex co-occurrence of multiple – including non-fatal – conditions predispose to increased  
51 COVID-19 severity and 2) how incorporating the whole breadth of medical diagnosis can guide  
52 the interpretation of genetic risk loci.

53

## 54 INTRODUCTION

55 From the outset of the COVID-19 pandemic it was evident that underlying conditions were  
56 associated with both the risk of infection with SARS-CoV-2, the cause of COVID-19, and the  
57 risk of it being severe, based on the risk of hospitalisation, to ventilation and death<sup>1</sup>. Initial  
58 focus was on the small number of diseases known to put people at higher risk of other  
59 respiratory viral infections, such as influenza. The Center for Disease Control in the US and  
60 other national bodies published lists of diseases associated with COVID-19 and in the UK more  
61 than 1 million people were identified as clinically extremely vulnerable and required  
62 ‘shielding’ based on having one or more specified diseases<sup>2</sup>. This included older individuals,  
63 men, and those with the presence of multiple, pre-existing long-term conditions, such as  
64 impaired immunity, type 2 diabetes, hypertension, or chronic kidney disease (CKD)<sup>1</sup>.

65 However, the vast body of COVID-19 risk factor studies were based on a candidate approach  
66 (e.g., diseases known to be associated with immune compromise), studying common diseases  
67 in limited numbers (usually fewer than 100 diseases)<sup>3-6</sup>. Studies that systematically  
68 investigated diseases across clinical specialties, including those primarily managed and  
69 treated in primary care are largely lacking, but are needed to understand why some patients  
70 with COVID-19 suffer from a severe outcome or death, albeit at supposedly low-risk. Such a  
71 systematic, ‘diseasome’-wide study can further improve our understanding of how variation  
72 in the host genome<sup>7,8</sup> confers risk for severe COVID-19 and guide drug target prioritisation  
73 strategies.

74 Here, we collated millions of health records from primary care, hospitalizations and cancer  
75 registrations, and death records among ~500,000 participants of the UK Biobank (UKB) into  
76 medical diagnosis concept terms, so-called ‘phecodes’<sup>9</sup>, to systematically assess the risk for  
77 severe COVID-19 and its post-acute sequelae, Long COVID, across the breadth of medical  
78 diagnosis. Apart from well-recognized high-risk patient groups, such as those with chronic  
79 kidney disease or those with compromised immune function, we demonstrate consistent  
80 evidence for the possible role of less recognized diseases and symptoms, including malaise  
81 and fatigue, based on survival and genetic susceptibility analyses. We finally observed that  
82 some genomic regions conferring a higher risk for severe COVID-19 might be protective for  
83 diseases that partially share pathomechanisms with COVID-19, or *vice versa*, with possible

84 implications for drug development programs, such as TYK2-inhibitors that may increase the  
85 risk for severe COVID-19.

## 86 **RESULTS**

87

88 Here, we systematically investigated the risk conferred by the presence and potential causal  
89 relevance of 1448 diseases for COVID-19 severity (hospitalisation, severe respiratory failure,  
90 and death) and Long COVID (**Fig. 1**), based on medical disorder concepts<sup>10,11</sup> defined and  
91 collated from >12 million medical records from primary (general practice), secondary care  
92 (hospital admissions), and disease registry (cancer registry), death certificates, and patient-  
93 reported conditions among 502,460 UKB participants (**Fig. 1 and Supplemental Tab. 1**).  
94 Incorporating primary care data more than doubled case numbers for more than half (n=817;  
95 56.4%) of the diseases considered (**Supplemental Tab. 1**).

96

### 97 ***Disease risk profiles for COVID-19 and Long COVID***

98

99 We collated EHRs up until 01/01/2020 to define pre-existing diseases at any timepoint before  
100 and defined severe COVID-19 based on hospital admissions and death certificates up until  
101 31/12/2022 totalling 7,507 (hospitalisation), 662 (respiratory failure), and 1,546 cases (death),  
102 with first cases occurring end of January 2020. Due to restricted availability of primary care  
103 data, we only included records up until 30/09/2021 to identify 470 cases of Long COVID.

104 We identified 1,128 significant ( $p < 1.1 \times 10^{-5}$ ) disease – COVID-19 outcome associations,  
105 including almost half (n=679) of the diseases considered with at least one of the four COVID-  
106 19 outcomes derived (**Fig. 2 and Supplemental Tab. 2**). Pre-existing diseases were almost  
107 exclusively associated with a higher risk for COVID-19 endpoints (median hazard ratio (HR):  
108 2.39, range: 0.59 - 17.3), only two diseases (benign neoplasm of skin and varicella infection)  
109 were associated with a decreased risk. Associated diseases spanned almost all chapters of the  
110 ICD-10 (17 out of 18) but were consistently enriched in the chapters ‘respiratory’ (odds ratio  
111 [OR]: 5.96; p-value:  $2.7 \times 10^{-8}$ ), ‘circulatory’ (OR: 2.95; p-value:  $3.5 \times 10^{-7}$ ), and  
112 ‘endocrine/metabolic’ diseases (OR: 2.76; p-value:  $9.1 \times 10^{-4}$ ) when associated with severe  
113 COVID-19. In contrast, pre-existing disease-codes classified as ‘symptoms’ were more than 13-  
114 fold enriched among diseases associated with an increased risk for Long COVID (OR: 13.2; p-  
115 value:  $3.6 \times 10^{-8}$ ) but also hospitalisation (OR: 5.53; p-value:  $9.9 \times 10^{-5}$ ) and death (OR: 3.06; p-  
116 value:  $7.3 \times 10^{-3}$ ).



117 For COVID-19 requiring hospitalisation, we replicated and refined known associations with  
118 serious pre-existing diseases that have been previously used to identify clinically extremely  
119 vulnerable people. This included respiratory diseases like pseudomonal pneumonia (HR: 7.53,  
120 95%-CI: 4.74-11.97; p-value<1.2x10<sup>-17</sup>), acute renal failure (HR: 4.02, 95%-CI: 3.74-4.32, p-  
121 value: <10<sup>-300</sup>) or type 2 diabetes with renal complications (HR: 7.44; 95%-CI: 5.67 – 9.76; p-  
122 value: 1.5x10<sup>-47</sup>), as well as immune deficiencies (e.g., deficiency of humoral immunity HR:  
123 6.02; 95%-CI: 4.36 – 8.31; p-value: 1.3x10<sup>-27</sup>) or patients under immune suppression (e.g., liver  
124 transplants HR: 7.25 95%-CI: 4.51 – 11.68, p-value: 3.4x10<sup>-16</sup>). However, we further observed  
125 strong associations with so far less recognized pre-existing mental health and psychiatric  
126 diseases and conditions with effect sizes comparable to those previously considered to  
127 identify extremely vulnerable people. This included symptoms of malaise and fatigue (HR:  
128 2.17, 95%-CI: 2.07 - 2.27, p-value: 4.4x10<sup>-222</sup>) or suicide attempts (HR 5.33, 95%-CI: 4.45 - 6.39,  
129 p-value: 3.6x10<sup>-73</sup>). Most diseases (n=641, 95.5%, p<sub>hetero</sub>>10<sup>-3</sup>) associated with similar  
130 magnitude across all three different definitions of COVID-19 severity, with different forms of  
131 dementias (p<sub>hetero</sub><2.1x10<sup>-24</sup>) being among the few exceptions, associating with hospitalisation  
132 (HR: 3.83; 95%-CI: 3.38 - 4.34; p-value: 2.3x10<sup>-97</sup>) and death (HR: 10.82; 95%-CI: 9.15 - 12.80;  
133 p-value: 1.4x10<sup>-170</sup>), but not severe respiratory failure (HR: 1.15; 95%-CI: 0.51 - 2.57; p-value:  
134 0.74) due to COVID-19.

135 In contrast, pre-existing diseases associated with an increased risk for Long COVID only  
136 partially overlapped with those increasing the risk for severe COVID-19. Most notably, we  
137 replicated associations with anxiety disorders<sup>12</sup> (HR: 2.59; 95%-CI: 2.09 - 3.20; p-value:1.8x10<sup>-</sup>  
138 <sup>18</sup>) and other mental health symptoms, but most prominently with symptoms of malaise and  
139 fatigue (HR: 2.78; 95%-CI: 2.29 - 3.37; p-value:1.5x10<sup>-25</sup>) that are hallmarks of Long COVID and  
140 were also strongly associated with severe COVID-19.

141 Almost all significant associations (99.8%, n=1126) were consistent when considering all-cause  
142 death as a competing event (**Supplementary Tab. 3**), and more than half (63.6%; n=718)  
143 remained statistically significant (p<4.4x10<sup>-5</sup>) when accounting for a large set of potential  
144 confounders in multivariable Cox-models (**Supplementary Tab. 3**). This suggests that  
145 potentially unreported associations, such as the increased risk for severe COVID-19 among  
146 patients reporting symptoms of malaise and fatigue (adjusted HR: 1.66, 95%-CI: 1.58 - 1.74,  
147 p-value=7.3x10<sup>-92</sup>), are not just a reflection of a general disease burden or other chronic  
148 diseases associated with a greater risk for severe COVID-19.

149 We observed limited evidence for effect modifications by sex (n=7), non-European ancestry  
150 (n=1), or age (n=8), but not social deprivation, with 16 disease – COVID 19 pairings showing  
151 evidence of significant differences (**Supplementary Tab. 4**;  $p < 3.6 \times 10^{-6}$ ). All included stronger  
152 effects in women compared to men, e.g., gout for hospitalised COVID-19 (women: HR: 2.56,  
153 95%-CI 2.21 - 2.96, p-value:  $1.3 \times 10^{-36}$ ; men: HR: 1.46, 95%-CI: 1.34 – 1.58, p-value:  $2.1 \times 10^{-19}$ ),  
154 among Europeans reporting vitamin D deficiencies (Europeans: HR: 2.31, 95%-CI: 2.13 – 2.51,  
155 p-value:  $2.1 \times 10^{-87}$ ; non-Europeans: HR: 1.31, 95%-CI: 1.08 – 1.60, p-value= $5.5 \times 10^{-3}$ ), or among  
156 younger participants, e.g., disorders of magnesium metabolism and death with COVID-19 as  
157 a likely result of renal failure (age  $\leq 65$  years: HR: 42.98, 95%-CI: 20.10 – 91.90, p-value:  $3.0 \times 10^{-22}$ ;  
158 age  $> 65$  years: HR: 5.35, 95%-CI: 3.51 - 8.16, p-value:  $5.9 \times 10^{-15}$ ).

159

### 160 ***Complex patterns of multimorbidity are associated with increased risk***

161 We next derived a disease-disease network<sup>13</sup> (**Fig. 3A**) to understand, whether the large set  
162 of diseases associated with an increased risk for severe COVID-19 act independently or rather  
163 reflect an increased risk among participants suffering from multiple pre-existing conditions,  
164 i.e., multimorbidity. The network contained a total of 1,381 diseases connected through 5,212  
165 edges based on non-random co-occurrence (**Supplementary Tab. 5a and b**; see **Methods**).  
166 Diseases segregated into 31 ‘communities’ being more strongly connected to each other  
167 compared to the rest of the network (**Fig. 3B and C**).

168 Two disease communities were consistently and strongly enriched for diseases associated  
169 with severe COVID-19. The first (e.g., OR: 5.20; p-value=  $2.2 \times 10^{-10}$ ; for severe respiratory  
170 failure) community was strongly enriched for circulatory (OR: 17.6; p-value:  $4.4 \times 10^{-39}$ ) and  
171 respiratory (OR: 10.3; p-value:  $7.8 \times 10^{-16}$ ) diseases, closely resembling the cardio-respiratory  
172 risk profile already described above (**Fig. 3B**). The second community consisted of diverse  
173 endocrine (OR: 6.19; p-value:  $1.9 \times 10^{-13}$ ) and circulatory disease (OR: 3.75; p-value:  $5.4 \times 10^{-8}$ ),  
174 and largely reflected the renal-diabetic risk profile (**Fig. 3C**). Accordingly, for each disease  
175 acquired during lifetime within the latter disease community, participants’ risk increased by  
176 18% and 20% to be hospitalised (HR: 1.18; 95%-CI: 1.17 - 1.18; p-value:  $p < 10^{-300}$ ) or die with  
177 COVID-19 (HR: 1.20; 1.19 - 1.20; p-value $< 10^{-300}$ ), respectively.

178 Diseases increasing the risk for severe COVID-19, but not Long COVID further significantly  
179 correlated with hub status (e.g., hospitalisation:  $r=0.59$ ; p-value:  $2.8 \times 10^{-124}$ ) in the disease-  
180 disease network (**Fig. 3D**), that is, diseases that connect a large cluster of diseases to the rest

181 of the network and might hence be considered as multimorbidity hotspots. For example,  
182 acute renal failure, strongly associated with severe COVID-19 (**Fig. 3D**), showed strong partial  
183 correlations with 30 other diseases and patients are hence prone to complex multimorbidity.  
184 However, the imperfect correlation between hub status and disease-association profiles  
185 indicates that certain forms of multimorbidity, such those related secondary malignancies of  
186 lymph nodes, are possibly less related to severe COVID-19.

187

### 188 ***Convergence of associated disease risk and genetic liability***

189 We next systematically characterised whether diseases identified to be associated with  
190 COVID-19 severity or Long COVID shared genetic similarity with host genetic susceptibility to  
191 severe COVID-19 to understand potential underlying causal mechanisms. We computed  
192 genetic correlation estimates for all 1128 disease – COVID-19 outcome pairs (see **Methods**)  
193 and observed 75 pairs (6.6%) that showed evidence for significant ( $p < 4.4 \times 10^{-5}$ ) and  
194 directionally consistent genetic correlations (**Fig. 4 and Supplemental. Tab 6**), indicating a  
195 putatively causal link of any of 57 unique diseases on severe COVID-19. We did not observe  
196 evidence of convergence for Long COVID, which might likely be explained by the still low  
197 statistical power for the respective genome-wide association study<sup>14</sup>.

198 The diseases with consistent evidence from survival and genetic analysis included well-  
199 described risk-increasing effects of pre-existing endocrine (e.g., type 2 diabetes), respiratory  
200 (e.g., respiratory failure), or renal (e.g., chronic kidney disease) diseases, but also digestive  
201 (e.g., gastritis and duodenitis), or musculoskeletal (e.g., rheumatoid arthritis) diseases, and  
202 further symptoms of malaise and fatigue ( $r_G = 0.26$ ;  $p\text{-value} = 4.7 \times 10^{-6}$ ) and abdominal pain  
203 ( $r_G = 0.33$ ;  $p = 2.5 \times 10^{-11}$ ), as well as adverse reactions to drugs (e.g., poisoning by antibiotics:  
204  $r_G = 0.38$ ;  $p\text{-value} = 2.2 \times 10^{-6}$ ). Findings that collectively demonstrated the need for a  
205 comprehensive assessment of disease-risk beyond few, selected common chronic conditions.  
206 Among the 41 diseases for which we had sufficient genetic instruments to perform more  
207 stringent Mendelian randomization (MR) analyses to assess causality (see **Methods**), we  
208 observed at least nominally significant evidence for gout and hospitalisation (OR: 1.03; 95%-  
209 CI: 1.01 – 1.05,  $p\text{-value}$ : 0.03), as well as arthropathy not elsewhere specified (OR: 1.28; 95%-  
210 CI: 1.06 – 1.55;  $p\text{-value}$ : 0.02) and unspecified monoarthritis (OR: 1.21; 95%-CI: 1.04 – 1.41;  
211  $p\text{-value}$ : 0.02) for severe COVID-19 (**Supplementary Tab. 7**). While we might have been still

212 underpowered for many diseases, this leaves the possibility that convergence of survival and  
213 genetic correlation analysis might, in part, be explained by shared risk factors.

214

215 ***Evidence for partially opposing roles of shared molecular mechanisms between severe***  
216 ***COVID-19 and related disorders***

217 To finally understand possible molecular mechanisms linking the ‘diseasome’ to COVID-19, we  
218 systematically profiled disease associations across 49 independent genomic regions linked to  
219 COVID-19 or Long COVID. We observed strong and robust evidence of a genetic signal shared  
220 between severe COVID-19 and a total of 33 diseases at nine loci (posterior probability (PP) >  
221 80%) (**Fig. 5A and Supplemental Tab. 8**). Apart from known pleiotropic loci, such as *ABO* and  
222 *FUT2* coding for blood group types, this included respiratory risk loci, albeit with contradicting  
223 effect estimates for three loci (**Fig. 5B**). While COVID-19 risk increasing alleles at *LZTFL1* and  
224 *TRIM4* were consistently associated with a higher risk for viral pneumonia and post-  
225 inflammatory pulmonary fibrosis, respectively, risk-increasing alleles at *MUC5B*, *NPNT*, and  
226 *PSMD3* were inversely associated with post-inflammatory pulmonary fibrosis and asthma. An  
227 observation that extended even beyond shared loci (**Fig. 5C**) illustrating a general trend of  
228 phenotypic divergence of genetic effects on diseases that share pathological features with  
229 severe COVID-19.

230 A notable observation was the *TYK2* locus that has previously been suggested to indicate the  
231 efficacy of successfully repurposed drugs for severe COVID-19<sup>15</sup>. Briefly, *TYK2* encodes for  
232 tyrosine kinase 2 (TYK2) a protein partially targeted by Janus kinase (JAK) inhibitors like  
233 baricitinib, that have been approved for rheumatoid arthritis and successfully repurposed for  
234 severe COVID-19, although predating possible evidence from genetic studies<sup>16–18</sup>. Accordingly,  
235 we observed that the same genetic variant, rs34536443 (PP=99.8%), associated with the risk  
236 for severe COVID-19 was also associated with, amongst others, the risk of rheumatoid  
237 arthritis, but in opposing effect directions (**Fig. 5B**). Rs34536443 is a loss-of-function missense  
238 variant (p.Pro1104Ala) for *TYK2* and the functionally impairing minor C allele was associated  
239 with a 50% increased risk for severe COVID-19 (odds ratio: 1.50; 95%-CI: 1.40 - 1.62, p-  
240 value=4.3x10<sup>-29</sup>) but a 23% reduced risk for rheumatoid arthritis (odds ratio: 0.77; 95%-CI:  
241 0.72 – 0.83; p-value=2.4x10<sup>-12</sup>) as well as other autoimmune diseases, in particular psoriasis  
242 (**Supplementary Tab. 8**). While the discrepancy between the success of the drug and genetic  
243 inference might be explained by the rather weak affinity of baricitinib for *TYK2*<sup>19</sup>, patients

244 undergoing trials with TYK2-inhibitors for psoriasis<sup>20</sup> might be at an elevated risk for severe  
245 COVID-19. This observation seemingly aligns with studies on *Tyk2*<sup>-/-</sup> mouse models reporting  
246 an impaired immune response to viral infections<sup>21</sup>.

247

## 248 DISCUSSION

249 An immediate understanding which patients are at greatest risk for severe COVID-19 and  
250 possibly death has proven to be instrumental to triage patients early in the pandemic to  
251 allocate critical care resources, such as ventilation or extracorporeal membrane oxygenation  
252 and, later, vaccination as well. The vast majority of studies<sup>3-6</sup>, however, focussed on a rather  
253 narrow set of common, usually chronic, conditions in the risk assessment leaving a  
254 considerable number of severe COVID-19 cases unexplained. We demonstrate here how  
255 capitalizing on the whole breadth of medical diagnoses through electronic health record  
256 linkage revealed 1) so far largely neglected patient populations at considerable risk, including  
257 those reporting symptoms of malaise and fatigue, and 2) that patients with multiple pre-  
258 existing conditions, in particular cardio-respiratory and endocrine-renal diseases, are probably  
259 at highest risk. Via integration of host genetics, we further provide evidence that a  
260 considerable set of diverse diseases may causally drive, or at least share causal drivers with,  
261 the risk for severe COVID-19, and exemplify how disease-wide characterisation of specific risk  
262 loci can inform disease mechanism and derivation of potentially druggable targets or adverse  
263 effects.

264 Among the diseases for which we observed consistent evidence from survival and genetic  
265 analysis to be linked to severe COVID-19 were multiple examples that have been rarely if at all  
266 reported. For example, we observed consistent evidence that symptoms of malaise and  
267 fatigue, as well as chronic fatigue, predispose to severe COVID-19. While the vast amount of  
268 literature currently discusses or reported these symptoms and disease as characteristics for  
269 COVID-19 and its post-acute sequelae<sup>12,22</sup>, little to nothing is known why patients reporting  
270 fatigue might be at higher risk. While our definition of ‘malaise and fatigue’ covered a broad  
271 range of partially unspecific medical codes with most cases (n=83,316 out of 87,908, 92.4%)  
272 originating from primary care, we observed consistent evidence for the refined diagnosis of  
273 chronic fatigue classified as post-viral fatigue symptom (**Supplemental Tab. 2**). A hypothesis  
274 might be, that patients that are already suffering from post-viral symptoms are at a greater  
275 risk in general to suffer from more severe courses of viral infections through yet to be  
276 identified mechanisms, that may well comprise an altered immune response. However, the  
277 evidence we provide does not preclude the existence of general, currently inaccessible, risk  
278 factors that predispose to more severe long-term consequences of viral infections.

279 Our extensive genetic analysis revealed some partially contradicting findings that may point  
280 to a segregation of overall genetic susceptibility and risk conferred by specific loci and  
281 mechanisms, replicating and augmenting findings from a previous study in the Million  
282 Veterans Study<sup>23</sup>. For example, we observed consistent evidence that pre-existing post-  
283 inflammatory pulmonary fibrosis, likely representing cases of idiopathic pulmonary fibrosis, is  
284 a strong risk factor for severe COVID-19 and death, and genome-wide effects were highly  
285 correlated between both ( $r_G=0.45$ ,  $p=2.3 \times 10^{-5}$ ), but effects at one of the strongest risk loci for  
286 post-inflammatory pulmonary fibrosis were protective for severe COVID-19. Our results  
287 thereby extend previous observations of misaligning effects at the *MUC5B* locus and  
288 idiopathic pulmonary fibrosis<sup>24,25</sup>. Results that might be explained by a latent, genome-wide  
289 risk component (as genome-wide significant loci do not contribute to genetic correlation  
290 analysis) that predisposes to severe lung fibrosis irrespective of the exact trigger, and specific  
291 molecular pathways characteristic for each disease that differ based on the required immune  
292 response to combat the infection. Cell-type and state-specific effects of shared genetic  
293 variants or possible design artefacts of GWAS studies of infectious disease, by which certain  
294 patient groups are 'underrepresented' due to tailored shielding efforts to minimize viral  
295 exposure, are other possible explanations. A similar paradoxical effect at the *TYK2* locus  
296 highlights the unique potential of integrating electronic health care records with genetic data  
297 to guide drug target identification and risk estimation, including emerging diseases and targets  
298 in clinical trials.

299 There are a number of limitations that need to be taken in consideration when interpreting  
300 our results. Firstly, the COVID-19 pandemic was characterised by strong disruptions of social  
301 life and health care, with different waves of new SARS-CoV-2 variants of different  
302 pathogenicity, lockdowns, and implementation of vaccines programs, all of which will have  
303 influenced the general risk to develop severe COVID-19 for which we could not control for in  
304 survival analysis. However, we observed generally little evidence of violation of the  
305 proportional hazard assumptions and filtered associations with evidence for strong violations.  
306 Secondly, we cannot exclude the possibility that the multitude of diseases associated with  
307 severe COVID-19 might also be explained by shared, generic risk factors, such as obesity or  
308 smoking, and we implemented sensitivity analysis and comprehensive genetic analysis to  
309 mitigate possible confounding, although even larger genetic studies are needed to identify



310 robust genetic signals for diseases like chronic fatigue and other rare diseases that we linked  
311 to COVID-19. Thirdly, while we obtained little evidence that disease-risk patterns differ across  
312 ancestries, the UK Biobank cohort is not a representative sample of the general population  
313 and does not sufficiently cover underrepresented populations, e.g., ethnic minorities, and  
314 additional work is needed to verify our observations in other populations. Lastly, while our  
315 effort to collate and harmonize electronic health records across various sources into medical  
316 concept terms covered almost 1,500 diseases, it is still only an approximation of the  
317 complexity of medical diagnosis and more work, using electronic health records at a national  
318 scale, is needed to refine and augment the space of diseases to investigate.

319 Our results demonstrate the unique potential of integrating health records from primary and  
320 secondary care with host genetic data to 1) rapidly identify patients at highest risk beyond  
321 commonly assessed risk groups, 2) understand pathological pathways, and 3) inform  
322 druggable strategies for emerging health threats, such as COVID-19.

## 323 **METHODS**

324

### 325 *Study population*

326 UK Biobank (UKB) is a prospective cohort study from the UK, which contains more than  
327 500,000 volunteers between 40 and 69 years of age at inclusion. The study design, sample  
328 characteristics and genome-wide genotype data have been described in Sudlow *et al.*<sup>26</sup> and  
329 Bycroft *et al.*<sup>27</sup>. The UKB was approved by the National Research Ethics Service Committee  
330 Northwest Multi-Centre Haydock and all study procedures were performed in accordance  
331 with the World Medical Association Declaration of Helsinki ethical principles for medical  
332 research. We included 502,460 individuals who had not withdrawn their consent. For survival  
333 analysis we considered a set of 438,917 individuals who were still alive at the beginning of the  
334 COVID-19 pandemic (01/01/2020) and had genetically inferred ancestry also beyond white  
335 Europeans. We chose the entire set of white Europeans (n=441,671) that passed standard  
336 quality control for genetic analysis to maximise statistical power.

337

### 338 *COVID-19 and Long COVID outcome definitions*

339 We defined a total of four different COVID-19 related outcomes closely aligned with previous  
340 studies<sup>8,14,28</sup>. We used hospital episode statistics to identify participants who had been



341 *'hospitalised'* with COVID-19 based on ICD-10 codes U07.1 and U07.2, and the same ICD-10  
342 codes to identify participants who have died from/with COVID-19 based on death registries.  
343 We did not require a positive PCR COVID-19 test due to differences in local reporting of test  
344 results. We adopted a slightly more sophisticated definition for 'severe respiratory failure',  
345 demanding a positive COVID-19 test (based on test results released for England, Scotland, and  
346 Wales provided by UKB through the COVID-19 Second Generation Surveillance System) within  
347 a month of acute respiratory failure, defined by ICD-10 codes J80, J96.00, J96.09, Z99.1 from  
348 hospital episode statistics or E85.1 and E85.2 when admitted to the intensive care unit. To  
349 define 'Long COVID' we used primary care data released by UKB  
350 (covid19\_emis\_gp\_clinical.txt, covid19\_tpp\_gp\_clinical.txt) searching for codes indicating  
351 suspected diagnosis [CTV3: Y2b89 – "Referral to post-COVID assessment clinic", Y2b8a –  
352 "Referral to Your COVID Recovery rehabilitation platform", Y2b87 – "Post-COVID-19  
353 syndrome", and Y2b88 – "Signposting to Your COVID Recovery"; SNOMED-CT:  
354 1325161000000102 – "Post-COVID-19 syndrome", 1325031000000108 – "Referral to post-  
355 COVID assessment clinic", 1325041000000104 – "Newcastle post-COVID syndrome Follow-up  
356 Screening Questionnaire", 1325181000000106 – "Referral to Your COVID Recovery  
357 rehabilitation platform", 1325021000000106 – "Ongoing symptomatic disease caused by  
358 severe acute respiratory syndrome coronavirus 2", 1325141000000103 – "Signposting to Your  
359 COVID Recovery", 1325081000000107 – "Assessment using Post-COVID-19 Functional Status  
360 Scale structured interview", 1325061000000103 – "Assessment using COVID-19 Yorkshire  
361 Rehabilitation Screening tool", 1325071000000105 – "Assessment using Newcastle post-  
362 COVID syndrome Follow-up Screening Questionnaire", 1325051000000101 – "COVID-19  
363 Yorkshire Rehabilitation Screening tool"]. For each event, we took the earliest record to define  
364 disease onset.

365

### 366 *Disease ascertainment*

367 We collated electronic health records (EHRs) from primary and secondary care, cancer  
368 registries, and death certificates based on tables provided by UK Biobank (gp\_clinical.txt,  
369 covid19\_emis\_gp\_clinical.txt, covid19\_tpp\_gp\_clinical.txt, hesin\_diag.txt, death.txt)  
370 downloaded in June 2021. We parsed all records to exclude codes with a recorded date before  
371 or within the year of birth of the participant to minimize coding errors from EHRs. We used  
372 mappings provided by UK Biobank to include self-reported conditions based on ICD-10 codes.

373 For each data set separately we generated mapping tables that link ICD-10, ICD-9, Read  
374 version 2, Clinical Terms Version 3 (CTV3) terms, or SNOMED-CT codes to a set of 1560  
375 summarized clinical entities called phecodes<sup>11,29</sup> (**Supplementary Tab. 1**). For example, more  
376 than 90 ICD-10 codes can indicate participants with type 1 diabetes that are here collectively  
377 summarized under the phecode ‘type 1 diabetes’<sup>30</sup>. We subsequently fused all data sources  
378 based on a common set of phecodes and retained for each participant and each phecode only  
379 the earliest entry across all EHR resources. We identified a total of 1448 phecodes with at least  
380 100 cases in the overall UKB sample. For each participant and phecode, we kept only the  
381 earliest date as an indicator for disease onset and defined all events occurring before  
382 01/01/2020 as prevalent, while we considered any event for genetic analysis. To increase the  
383 accessibility of our results, we used the term ‘disease’ instead of ‘phecode’ throughout the  
384 paper.

385

### 386 *Survival analysis*

387 We used Cox-proportional hazard models to estimate the risk associated with each disease  
388 and any of the four COVID-19 related outcomes with age as the underlying scale, adjusting for  
389 sex (omitted for sex-specific diseases) and genetically inferred ancestry. For each COVID-19  
390 outcome, we defined controls separately as all those participants without a corresponding  
391 record during the time course of the study. We repeated Cox-proportional hazard models  
392 considering all-cause death as a competing event rather than censoring as a sensitivity  
393 analysis. We selected 01/03/2020 as the starting point of our study and used 31/12/2022  
394 (COVID-19 endpoints) or 30/09/2021 (Long COVID) as endpoints of the observation period  
395 depending on the availability of health record linkage. We computed Schoenfeld residuals to  
396 test for the proportional hazard assumption, and further computed time varying effects of  
397 diseases by introducing 6 months breaks. For each disease – COVID-19 model, we considered  
398 all participants that passed inclusion criteria. We applied stringent multiple testing correction  
399 ( $p < 0.05/4 * 1448 = 4.8 \times 10^{-8}$ ) and further filtered results for those possibly violating the  
400 proportional hazard assumption ( $p < 10^{-3}$ ). To establish endpoint-specific associations, we  
401 performed meta-analysis across disease associations for all three COVID-19 endpoints derived  
402 using the R package *metafor* (v.3.8.1). We performed additional sensitivity analysis using an  
403 extended set of confounders similar to previous work<sup>31</sup>, including self-reported smoking status  
404 and alcohol consumption, body mass index, and Townsend deprivation index (all based on

405 baseline values), healthcare utilization in the five years before the pandemic (number of stays  
406 and total days in hospital), as well as a variable indicating participants with two or more long-  
407 term conditions.

408 We tested for a potential modifying effect of sex, non-European ancestry, age ( $\leq 65$  years vs  
409  $> 65$  years), and social deprivation (Townsend index above median vs below median; median  
410 = -2.22) on the results by systematically performing interaction testing, i.e., introducing a  
411 disease – sex/non-European ancestry interaction term into Cox-models. For the latter, we  
412 requested to have at least 50 observations in each group to ensure model convergence. We  
413 subsequently corrected for a total of 13,728 tests ( $p < 3.6 \times 10^{-6}$ ). All statistical analysis were  
414 implemented using R v4.1.2.

415

#### 416 *Disease network*

417 We computed a sex-aware disease network using partial correlations as implemented in the  
418 R package *ppcor* (v.2.1.1) following previous work<sup>13</sup>. Briefly, partial correlations ( $r_P$ ) account  
419 for the fact, that a correlation, or co-occurrence, between two diseases might be driven by a  
420 third or any other disease considered. We retained only partial correlations passing stringent  
421 multiple testing ( $p < 4.9 \times 10^{-8}$ ) and  $r_P > 0.02$  as we reasoned that a disease-disease network likely  
422 exhibits scale-free properties<sup>32</sup> with node degrees following a power law. The latter step  
423 omitted many significant, but very weak and potentially artificial edges. The final network  
424 contained 5212 edges connecting 1381 diseases. We then performed community detection  
425 based on the Girvan-Newman algorithm to identify groups of diseases that were more closely  
426 connected with each other compared to all other diseases in the network. We finally  
427 computed different node characteristics to identify diseases with important roles in the  
428 network. We implemented and visualized this analysis with the R package *igraph* (v.1.3.1).

429

#### 430 *Genotyping, quality control, and participant selection*

431 Details on genotyping for UKBB have been reported in detail by Bycroft et al.<sup>27</sup>. Briefly, we  
432 used data from the ‘v3’ release of UKBB containing the full set of Haplotype Reference  
433 Consortium (HRC) and 1000 Genomes imputed variants. We applied recommended sample  
434 exclusions by UKBB including low quality control values, sex mismatch, and heterozygosity  
435 outliers. We defined a subset of ‘white European’ ancestry by clustering participants based on  
436 the first four genetic principal component derived from the genotyped data using a k-means

437 clustering approach with  $k=5$ . We classified all participants who belonged to the largest cluster  
438 and self-identified as of being ‘white,’ ‘British,’ ‘Any other white background,’ or ‘Irish’ as ‘white  
439 European’. After application of quality control criteria and dropping participants who have  
440 withdrawn their consent, a total of 441,671 UKBB participants were available for analysis with  
441 genotype and phenotype data.

442 We used only called or imputed genotypes and short insertions/deletions (here commonly  
443 referred to as SNPs for simplicity) with a minor allele frequency (MAF)  $> 0.001\%$ , imputation  
444 score  $>0.4$  for common (MAF $\geq 0.5\%$ ) and  $>0.9$  for rare (MAF $<0.5\%$ ), within Hardy-Weinberg  
445 equilibrium ( $p_{\text{HWE}} > 10^{-15}$ ), and minor allele count (MAC)  $> 10$ . This left us with 15,519,342  
446 autosomal and X-chromosomal variants for statistical analysis. GRCh37 was used as reference  
447 genome assembly.

448  
449 *Genome-wide association studies*

450 We performed genome-wide association studies (GWAS) for a total of 1,445 diseases with at  
451 least 80 cases ( $n > 100$  prior genetic exclusions; 3 diseases dropped out) using REGENIE v2.2.4  
452 via a two-step procedure to account for population structure as described in detail  
453 elsewhere<sup>33</sup>. We used a set of high-quality genotyped variants (MAF $>1\%$ , MAC $>100$ ,  
454 missingness  $<10\%$ ,  $p_{\text{HWE}} > 10^{-15}$ ) in the first step for individual trait predictions using the leave  
455 one chromosome out (LOCO) scheme. These predictions were used in the second step as  
456 offset to run logistic regression models with saddle point approximation to account for  
457 case/control imbalance and rare variant associations. Each model was adjusted for age, sex,  
458 genotyping batch, assessment centre, and the first ten genetic principal components. For  
459 diseases reported in only one sex ( $n=113$  in women,  $n=26$  in men), we excluded the respective  
460 sex from GWAS to avoid inflation by inappropriate controls. In general, we included all  
461 participant with a disease in their records as case and treated all other participants as controls  
462 to make best use of the computational efficacy of REGENIE. Testing for reported SNPs showed  
463 highly consistent results whether related diseases were included as controls rather than  
464 omitted. We used LD-score regression to test for genomic inflation (LDSC v1.0.1)<sup>34</sup>.

465  
466 *COVID-19 genetic correlation and Mendelian randomization*

467 We downloaded GWAS summary statistics for two different endpoints related to COVID-19  
468 (A2 – critical illness; B2 – hospitalisation) and Long COVID (stringent case definition vs broad

469 control set) provided by the COVID-19 Host Genetics Initiative (release 7)<sup>8,14</sup>. We used  
470 summary statistics excluding UKB to avoid sample overlap. We computed genetic correlations  
471 as implemented by LD-score regression (LDSC v1.0.1)<sup>34</sup> with precomputed LD-scores,  
472 excluding the extended MHC region. To test for potentially causal associations of diseases onto  
473 COVID-19, we used genetic instruments identified in the present study for a total of 41  
474 diseases with at least five genetic variants and evidence for significant genetic correlations in  
475 a two-sample MR setting. We used MR-PRESSO<sup>35</sup> as a first line tool as previously suggested<sup>36</sup>  
476 to account for possible pleiotropy and subsequently report effect estimates from inverse-  
477 variance weighted analysis as the primary results. We flagged MR results that showed signs  
478 of heterogeneity across instruments using Cochran Q statistic. We excluded any variants  
479 mapping to the MHC regions for all analysis and implemented MR using the R packages  
480 *MendelianRandomization* (v0.6.0)<sup>37</sup> and *TwoSampleMR* (v0.5.6)<sup>38</sup>.

481

#### 482 *Colocalisation at COVID-19 risk loci*

483 We collected association statistics for a total of 49 independent risk loci for COVID-19 (selected  
484 based on regional clumping ( $\pm 500\text{kb}$ ) of COVID-19 HGI GWAS statistics excluding UKB  
485 participants, but SNPs available among imputed genetic data in UKB) across all 1445 diseases  
486 included in the genetic analysis. For variant – disease pairings passing a moderate significance  
487 threshold ( $p < 10^{-6}$ ), we implemented statistical colocalization<sup>39</sup> accounting for multiple causal  
488 genetic variants via fine-mapping<sup>40</sup> using the R packages *coloc* (v.5.3.2) and *susieR* (v.0.11.92).  
489 We allowed for a maximum of five causal variants during fine-mapping of the disease and  
490 linked COVID-19 outcome (via a potentially shared genetic variant) and subsequently tested  
491 each credible set for colocalization. We applied a stringent prior to consider a shared signal  
492 ( $p_{12} = 5 \times 10^{-6}$ ) and further filtered signals with evidence that the lead signal ( $r^2$  with best  
493 remaining signal  $> 0.8$ ) for COVID-19 was dropped from the set of overlapping genetic variants  
494 between our UKB GWAS and the COVID-19 GWAS.

495

## 496 **ACKNOWLEDGEMENT**

497 The authors acknowledge the Scientific Computing of the IT Division at the Charité -  
498 Universitätsmedizin Berlin for providing computational resources that have contributed to the  
499 research results reported in this paper ([https://](https://www.charite.de/en/research/research_support_services/research_infrastructure/science_it/#c30646061)  
500 [www.charite.de/en/research/research\\_support\\_services/research\\_infrastructure/science\\_it](https://www.charite.de/en/research/research_support_services/research_infrastructure/science_it/#c30646061)  
501 [#c30646061](https://www.charite.de/en/research/research_support_services/research_infrastructure/science_it/#c30646061)). This work was supported by funding of the German Centre for Cardiovascular  
502 Research (DZHK) and the German Ministry of Education and Research (BMBF), and the  
503 UKRI/NIHR Strategic Priorities Award in Multimorbidity Research for the Multimorbidity  
504 Mechanism and Therapeutics Research Collaborative (MR/V033867/1) to C.L., H.H. and S.D.  
505 are supported by Health Data Research UK and the National Institute for Health Research  
506 (NIHR) Biomedical Research Centre at University College London NHS Hospitals Trust. M.A.  
507 and G.K. are supported by National Institutes of Health/National Institute on Aging grants  
508 RF1AG059093, U01AG061359, U19AG063744, R01AG069901, U19AG074879, and  
509 R01AG081322. G.K. also received funding from the German Federal Ministry of Education and  
510 Research (BMBF) (BiomarKid, 01EA2203B) under the umbrella of the European Joint  
511 Programming Initiative “A Healthy Diet for a Healthy Life” (JPI HDHL) and of the ERA-NET  
512 Cofund ERA-HDHL (GA N° 696295 of the EU Horizon 2020 Research and Innovation  
513 Programme) and of the German Network for Mitochondrial Disorders (mitoNET, 01GM1906C).  
514 This work was supported by the de.NBI Cloud within the German Network for Bioinformatics  
515 Infrastructure (de.NBI) funded by the German Federal Ministry of Education and Research  
516 (BMBF) (031A532B, 031A533A, 031A533B, 031A534A, 031A535A, 031A537A, 031A537B,  
517 031A537C, 031A537D, 031A538A).

518

### 519 ***Data availability***

520 Genome-wide summary statistics for diseases (‘phecodes’) in UK Biobank were generated, in  
521 part, from primary care data released to UK Biobank specifically for the use of COVID-19  
522 research only, according to COPI regulations, and can therefore not be made publicly available.  
523 All Access to individual level data can be requested by bona fide researchers from the UK  
524 Biobank (<https://www.ukbiobank.ac.uk/>). This research has been conducted under the  
525 application 44448. Mapping of Read codes to phecodes can be downloaded from  
526 <https://github.com/spiros/ukbiobank-read-to-phecode>.

527

528 ***Code availability***

529 Associated code and scripts for the analysis will be made available upon publication.

530

531 ***Declaration of Interest***

532 None of the authors have a conflict of interest.

533

534 ***Author contributions***

535 Conceptualization: MP, HH, CL

536 Data curation/Software: MP, SD, YS, MU, MA

537 Formal Analysis: MP, YS

538 Methodology: MP, SD, TN

539 Visualization: MP

540 Funding acquisition: CL, HH

541 Project administration: CL, HH

542 Supervision: MP, CL, HH

543 Writing – original draft: MP, CL, HH

544 Writing – review & editing: SD, SY, MA, GK, TN

545

546



547 FIGURE LEGENDS

548

549 **Figure 1 Outline of the study design.** Scheme of the study design and analysis done, illustrating our  
550 workflow to define disease mechanisms that may causally contribute to severe COVID-19 or Long  
551 COVID. SNPs = single nucleotide polymorphisms; SPA = saddle point approximation; MAF = minor allele  
552 frequency; \*COVID-19 HGI = COVID-19 Host Genetic Initiative, but excluding contributions from UK  
553 Biobank

554

555 **Figure 2 Association results for three different COVID-19 outcomes and long COVID.** Each panel  
556 contains association statistics, p-values, from Cox-proportional hazard ratios testing for an association  
557 between the disease on the x-axis and three different COVID-19 outcomes, as well as Long COVID.  
558 Disease associations passing the multiple testing correction (dotted line,  $p < 1.1 \times 10^{-5}$ ) are depicted by  
559 larger triangles of which facing up ones indicate positive, e.g., increased disease risk, associations and  
560 downward facing *vice versa*. The diseases are ordered by ICD-10 chapters (colours) and the top ten for  
561 each endpoint annotated. The underlying statistics can be found in Supplemental Table 2.

562

563 **Figure 3 Disease-disease network and hub score.** **A** Disease – disease network based on significant  
564 ( $p < 4.8 \times 10^{-8}$ ) positive partial correlations. Nodes (diseases) are coloured by ICD-10 chapters and  
565 strength of partial correlation depicted by width of the edges. **B/C** Same network, but only highlighting  
566 two disease communities strongly enriched for associations with severe COVID-19. **D** Hub score for the  
567 30 diseases with highest values and associated association statistics, hazard ratios with 95%-  
568 confidence intervals, from Cox-proportional hazard models. Significant associations are indicated by  
569 filled boxes. Colours according to ICD-10 chapters.

570

571 **Figure 4 Convergence of Cox-models and genetic correlations.** The first three panels show association  
572 statistics, hazard ratios (box) and 95%-confidence interval (lines), for 57 diseases with evidence of  
573 convergence with genetic correlation analysis, that are shown in the last two panels (box – genetic  
574 correlation; lines – 95%-confidence intervals). Disease have been grouped by ICD-10 chapters and  
575 coloured accordingly (see Fig. 2 or 3 for legend).

576

577 **Figure 5 Shared genetic architecture at COVID-19 risk loci.** **A** Network representation of significant  
578 ( $PP > 80\%$ ) colocalization results. Loci are depicted as white rectangles and diseases as coloured nodes  
579 according to ICD-10 chapters. Edges represent strong evidence for colocalisation, and solid lines  
580 indicate a risk-increasing effect of the COVID-19 risk increasing allele, whereas dashed lines indicate  
581 protective effects. **B** Forest plot displaying hazard ratios with 95%-confidence intervals for each variant  
582 and different COVID-19 and colocalising disease outcomes. **C** Heatmap of effect estimates across 49  
583 independent genetic loci associated with increased risk for sever COVID-19 and corresponding effects  
584 on six selected traits that showed evidence of colocalization at least one other locus. Black rectangles  
585 indicate genome-wide significant effects ( $p < 5 \times 10^{-8}$ ).

586



587 REFERENCES

588

- 589 1. Merad, M., Blish, C. A., Sallusto, F. & Iwasaki, A. The immunology and immunopathology  
590 of COVID-19. *Science* **375**, 1122–1127 (2022).
- 591 2. GOV.uk. No Title. [https://www.gov.uk/government/news/clinically-extremely-vulnerable-](https://www.gov.uk/government/news/clinically-extremely-vulnerable-receive-updated-guidance-in-line-with-new-national-restrictions)  
592 [receive-updated-guidance-in-line-with-new-national-restrictions](https://www.gov.uk/government/news/clinically-extremely-vulnerable-receive-updated-guidance-in-line-with-new-national-restrictions).
- 593 3. Kompaniyets, L. *et al.* Underlying Medical Conditions and Severe Illness Among 540,667  
594 Adults Hospitalized With COVID-19, March 2020-March 2021. *Prev. Chronic. Dis.* **18**, E66  
595 (2021).
- 596 4. Booth, A. *et al.* Population risk factors for severe disease and mortality in COVID-19: A  
597 global systematic review and meta-analysis. *PLoS One* **16**, e0247461 (2021).
- 598 5. Williamson, E. J. *et al.* Factors associated with COVID-19-related death using  
599 OpenSAFELY. *Nature* **584**, 430–436 (2020).
- 600 6. McKeigue, P. M. *et al.* Rapid Epidemiological Analysis of Comorbidities and Treatments as  
601 risk factors for COVID-19 in Scotland (REACT-SCOT): A population-based case-control  
602 study. *PLoS Med.* **17**, 1–17 (2020).
- 603 7. Pairo-Castineira, E. *et al.* GWAS and meta-analysis identifies 49 genetic variants  
604 underlying critical COVID-19. *Nature* (2023) doi:10.1038/s41586-023-06034-3.
- 605 8. COVID-19 Host Genetics Initiative. A second update on mapping the human genetic  
606 architecture of COVID-19. *Nature* **621**, E7–E26 (2023).
- 607 9. Wei, W.-Q. *et al.* Evaluating phecodes, clinical classification software, and ICD-9-CM  
608 codes for phenome-wide association studies in the electronic health record. (2017)  
609 doi:10.1371/journal.pone.0175508.
- 610 10. Bastarache, L. Using Phecodes for Research with the Electronic Health Record: From  
611 PheWAS to PheRS. *Annu. Rev. Biomed. Data Sci.* **4**, 1–19 (2021).

- 612 11. Wu, P. *et al.* Mapping ICD-10 and ICD-10-CM Codes to Phecodes: Workflow Development  
613 and Initial Evaluation. *JMIR Med. Inform.* **7**, e14325 (2019).
- 614 12. Su, S. *et al.* Epidemiology, clinical presentation, pathophysiology, and management of  
615 long COVID: an update. *Mol. Psychiatry* (2023) doi:10.1038/s41380-023-02171-3.
- 616 13. Kuan, V. *et al.* Identifying and visualising multimorbidity and comorbidity patterns in  
617 patients in the English National Health Service: a population-based study. *Lancet Digit.*  
618 *Health* **5**, e16–e27 (2023).
- 619 14. Lammi, V. *et al.* Genome-wide Association Study of Long COVID Authors. 1–25 (2023).
- 620 15. Pairo-Castineira, E. *et al.* Genetic mechanisms of critical illness in COVID-19. *Nature* **591**,  
621 92–98 (2021).
- 622 16. Letter, T. M. An EUA for baricitinib (Olumiant) for COVID-19. *Med. Lett. Drugs Ther.* **62**,  
623 202–203 (2020).
- 624 17. Kalil, A. C. *et al.* Baricitinib plus Remdesivir for Hospitalized Adults with Covid-19. *N. Engl.*  
625 *J. Med.* **384**, 795–807 (2021).
- 626 18. Hoang, T. N. *et al.* Baricitinib treatment resolves lower-airway macrophage inflammation  
627 and neutrophil recruitment in SARS-CoV-2-infected rhesus macaques. *Cell* **184**, 460-  
628 475.e21 (2021).
- 629 19. Chimalakonda, A. *et al.* Selectivity Profile of the Tyrosine Kinase 2 Inhibitor  
630 Deucravacitinib Compared with Janus Kinase 1/2/3 Inhibitors. *Dermatol. Ther.* **11**, 1763–  
631 1776 (2021).
- 632 20. Elyoussfi, S., Rane, S. S., Eyre, S. & Warren, R. B. TYK2 as a novel therapeutic target in  
633 psoriasis. *Expert Rev. Clin. Pharmacol.* **16**, 549–558 (2023).
- 634 21. Strobl, B. *et al.* Novel functions of tyrosine kinase 2 in the antiviral defense against  
635 murine cytomegalovirus. *J. Immunol. Baltim. Md 1950* **175**, 4000–8 (2005).

- 636 22. Davis, H. E., McCorkell, L., Vogel, J. M. & Topol, E. J. Long COVID: major findings,  
637 mechanisms and recommendations. *Nat. Rev. Microbiol.* **21**, 133–146 (2023).
- 638 23. Verma, A. *et al.* A Phenome-Wide Association Study of genes associated with COVID-19  
639 severity reveals shared genetics with complex diseases in the Million Veteran Program.  
640 *PLoS Genet.* **18**, e1010113 (2022).
- 641 24. Fadista, J. *et al.* Shared genetic etiology between idiopathic pulmonary fibrosis and  
642 COVID-19 severity. *EBioMedicine* **65**, 103277 (2021).
- 643 25. Verma, A. *et al.* A MUC5B Gene Polymorphism, rs35705950-T, Confers Protective Effects  
644 Against COVID-19 Hospitalization but Not Severe Disease or Mortality. *Am. J. Respir. Crit.*  
645 *Care Med.* **206**, 1220–1229 (2022).
- 646 26. Sudlow, C. *et al.* UK biobank: an open access resource for identifying the causes of a  
647 wide range of complex diseases of middle and old age. *PLoS Med.* **12**, e1001779 (2015).
- 648 27. Bycroft, C. *et al.* The UK Biobank resource with deep phenotyping and genomic data.  
649 *Nature* **562**, 203–209 (2018).
- 650 28. Thygesen, J. H. *et al.* COVID-19 trajectories among 57 million adults in England: a cohort  
651 study using electronic health records. *Lancet Digit. Health* **4**, e542–e557 (2022).
- 652 29. Denaxas, S. Mapping the Read2/CTV3 controlled clinical terminologies to Phecodes in UK  
653 Biobank primary care electronic health records: implementation and evaluation. *Proc*  
654 *Am. Med. Inform. Assoc. Annu. Symp. 2021* (2021).
- 655 30. Bastarache, L. Using Phecodes for Research with the Electronic Health Record: From  
656 PheWAS to PheRS. *Annu. Rev. Biomed. Data Sci.* **4**, 1–19 (2021).
- 657 31. Zang, C. *et al.* Data-driven analysis to understand long COVID using electronic health  
658 records from the RECOVER initiative. *Nat. Commun.* **14**, 1948 (2023).

- 659 32. Barabasi, A. & Albert, R. Emergence of scaling in random networks. *Science* **286**, 509–12  
660 (1999).
- 661 33. Mbatchou, J. *et al.* Computationally efficient whole-genome regression for quantitative  
662 and binary traits. *Nat. Genet.* **53**, 1097–1103 (2021).
- 663 34. Bulik-Sullivan, B. K. *et al.* LD Score regression distinguishes confounding from  
664 polygenicity in genome-wide association studies. *Nat. Genet.* **47**, 291–5 (2015).
- 665 35. Verbanck, M., Chen, C.-Y., Neale, B. & Do, R. Detection of widespread horizontal  
666 pleiotropy in causal relationships inferred from Mendelian randomization between  
667 complex traits and diseases. *Nat. Genet.* **50**, 693–698 (2018).
- 668 36. COVID-19 Host Genetics Initiative. Mapping the human genetic architecture of COVID-  
669 19. *Nature* **600**, 472–477 (2021).
- 670 37. Yavorska, O. O. & Burgess, S. MendelianRandomization: an R package for performing  
671 Mendelian randomization analyses using summarized data. *Int. J. Epidemiol.* **46**, 1734–  
672 1739 (2017).
- 673 38. Hemani, G. *et al.* The MR-Base platform supports systematic causal inference across the  
674 human phenome. *eLife* **7**, (2018).
- 675 39. Giambartolomei, C. *et al.* Bayesian test for colocalisation between pairs of genetic  
676 association studies using summary statistics. *PLoS Genet.* **10**, e1004383 (2014).
- 677 40. Wallace, C. A more accurate method for colocalisation analysis allowing for multiple  
678 causal variants. *PLoS Genet.* **17**, e1009440 (2021).
- 679

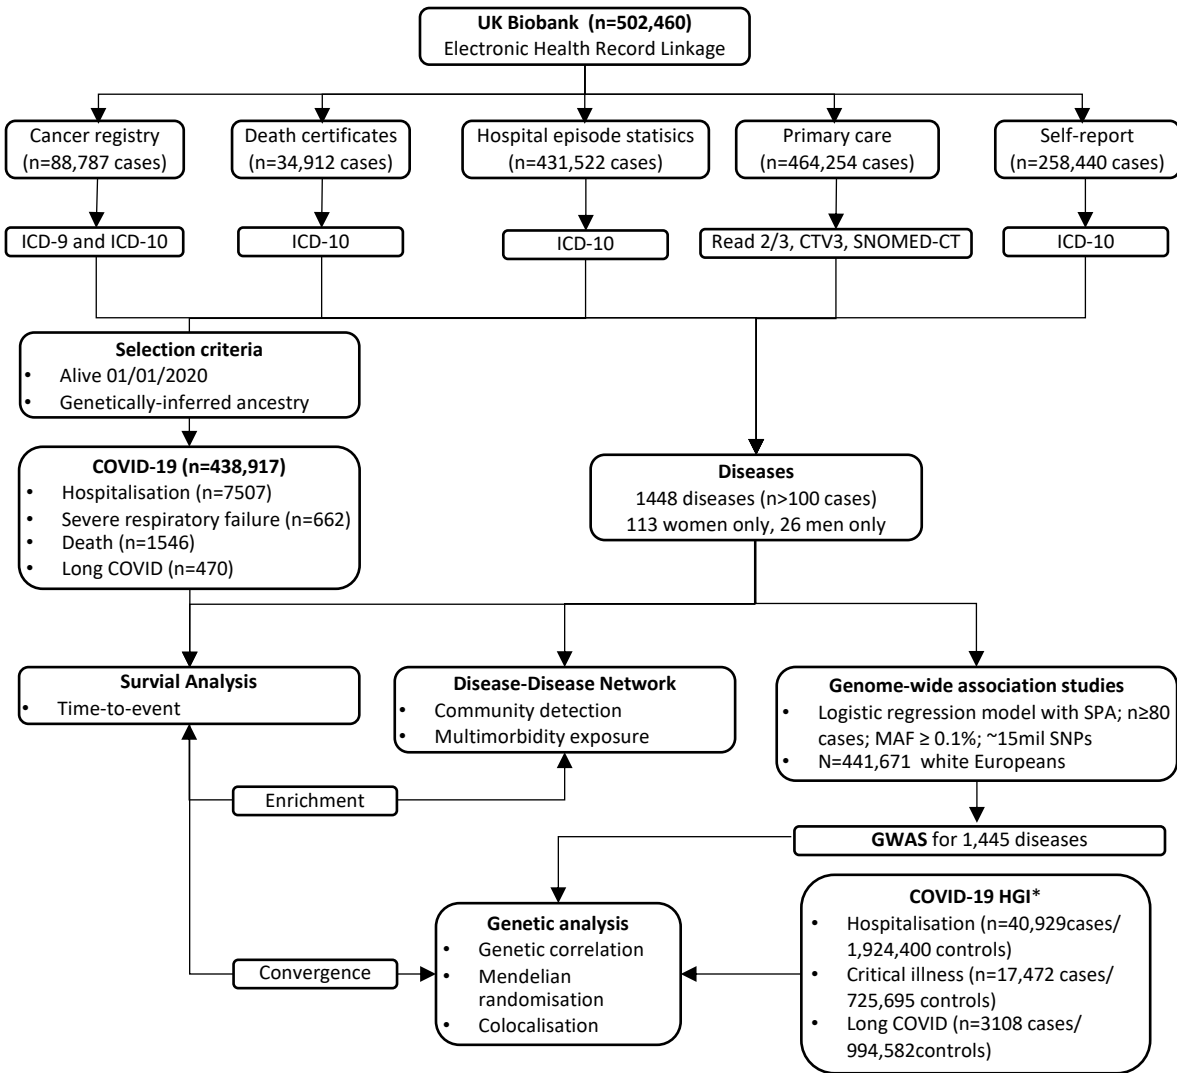

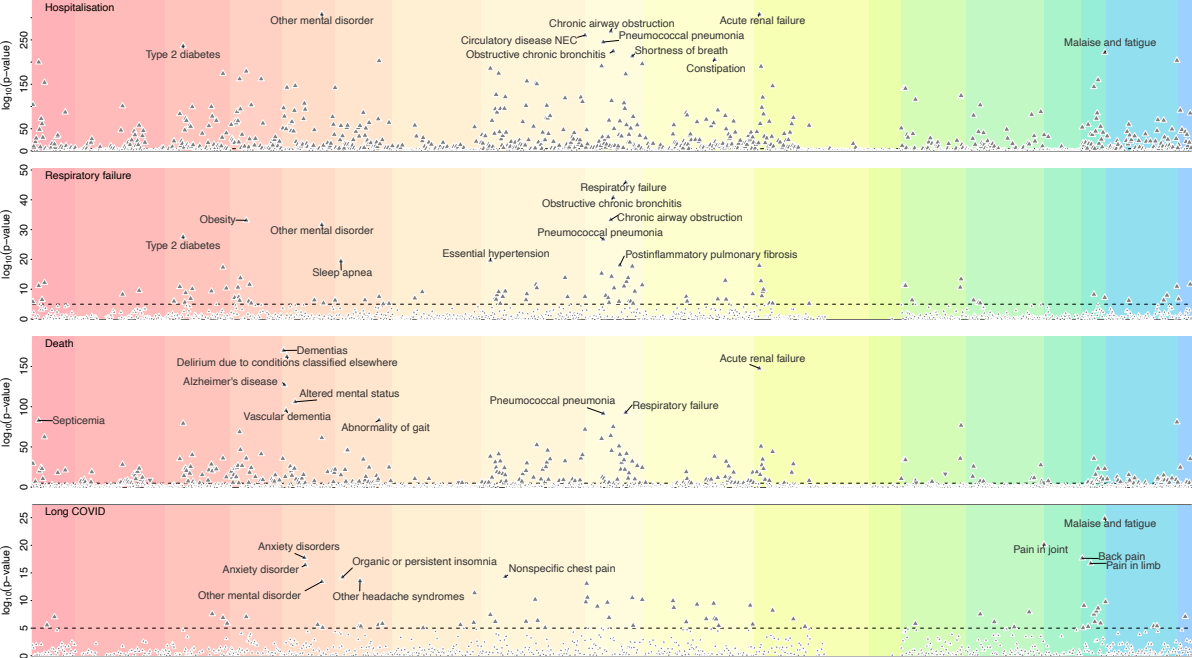

Diseases ordered by ICD-10 chapter

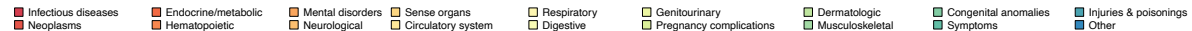

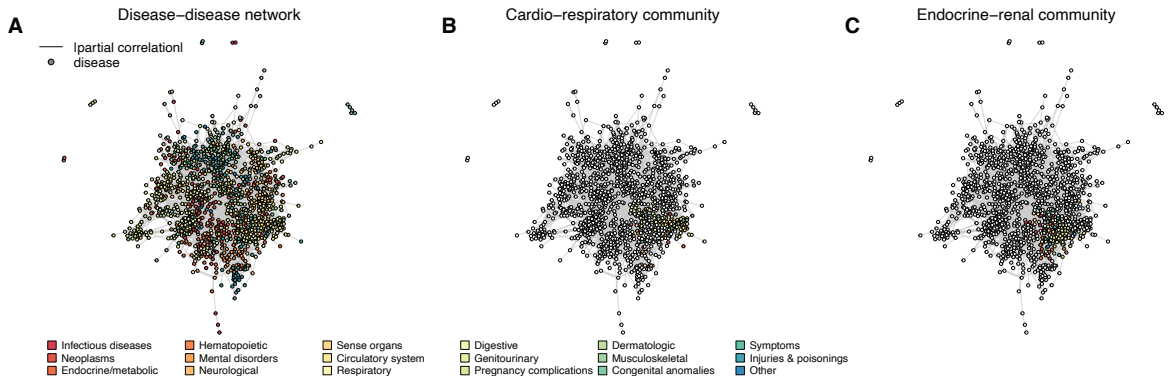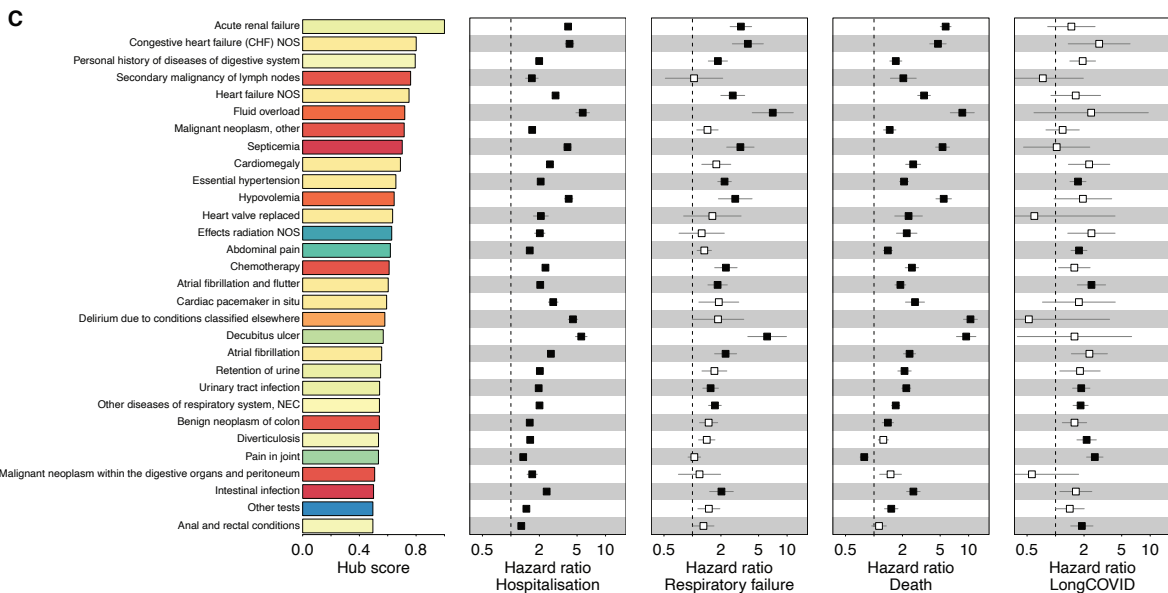

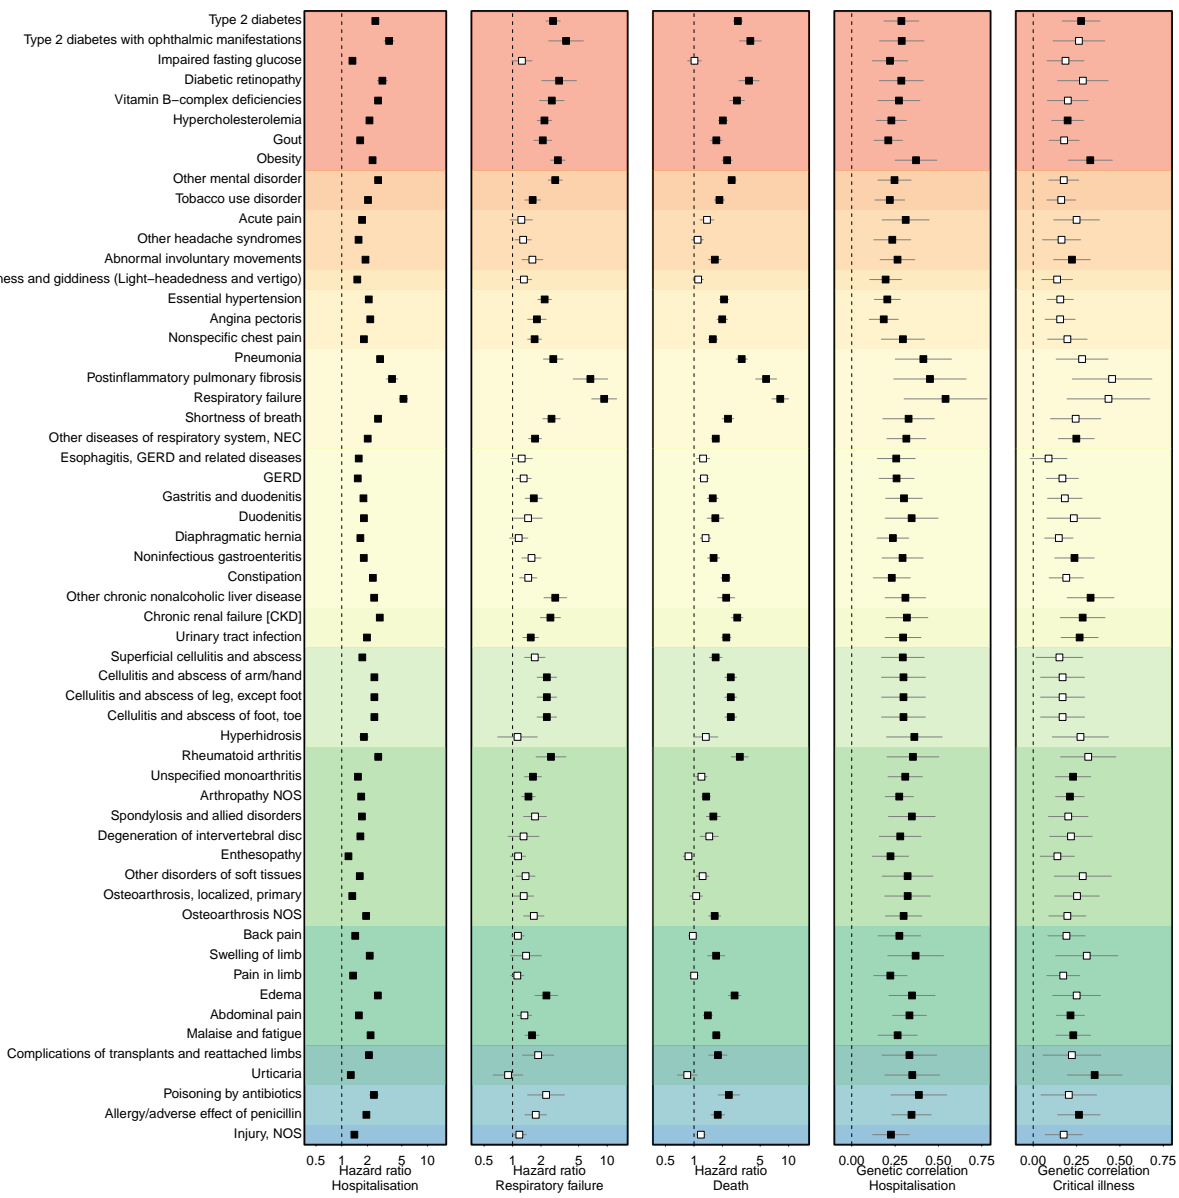



**A**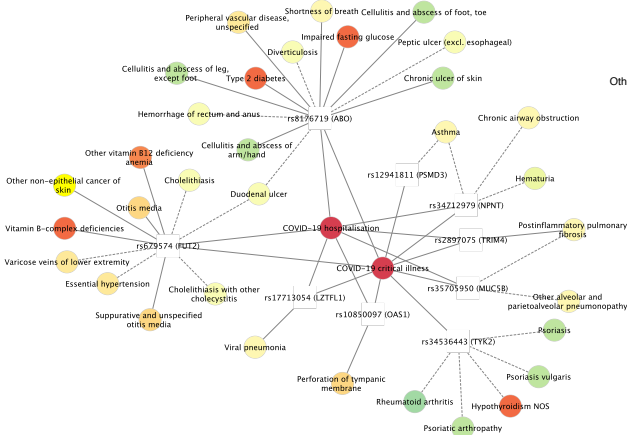**B**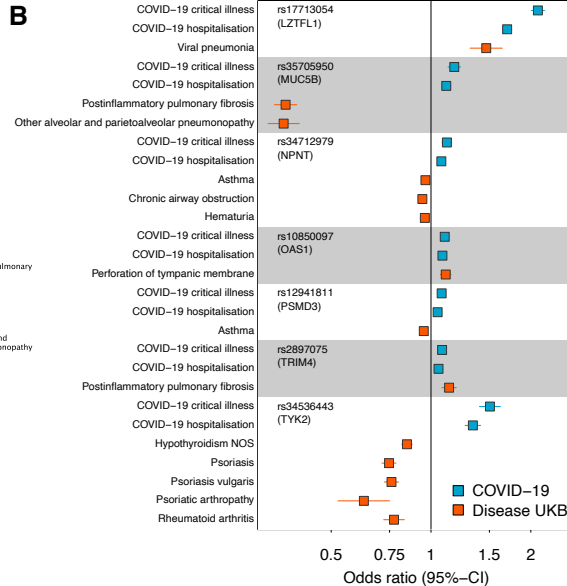**C**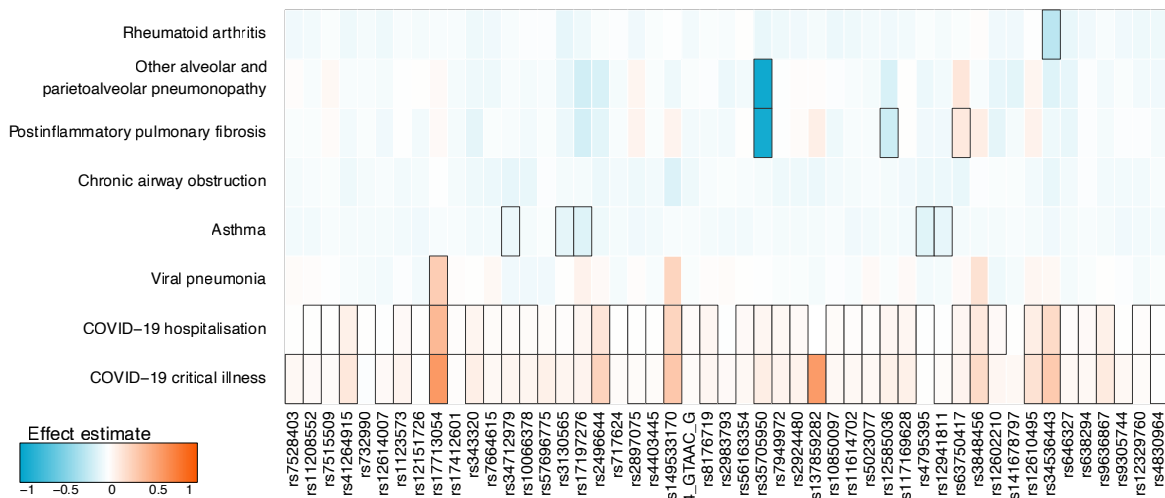

Source: https://medrxiv.org/content/10.1101/2023.05.23.23290408v3.full.pdf
